# Supplementary material for: Reproducible SERRS from structured gold surfaces
Source: Royal Society of Chemistry journal article supplement (doi:10.1039/b712144j), 2007-01-01
Supplement: b712144j.pdf [file b712144j.pdf]

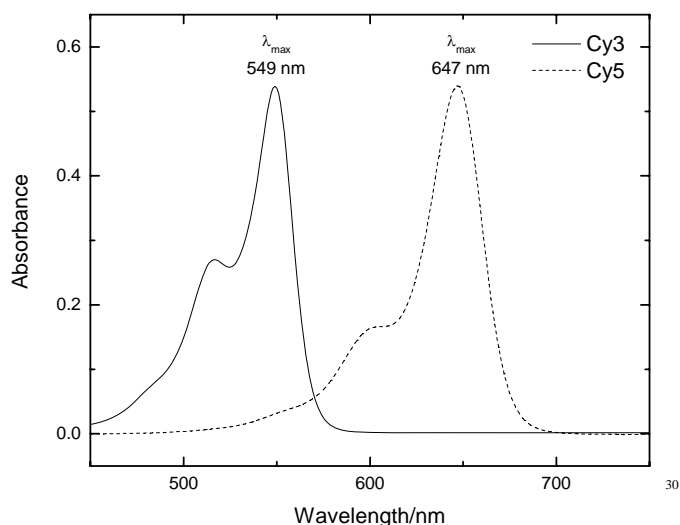

**Figure S1.** Absorption spectra of Cy3<sup>TM</sup> and Cy5<sup>TM</sup> in aqueous solution.

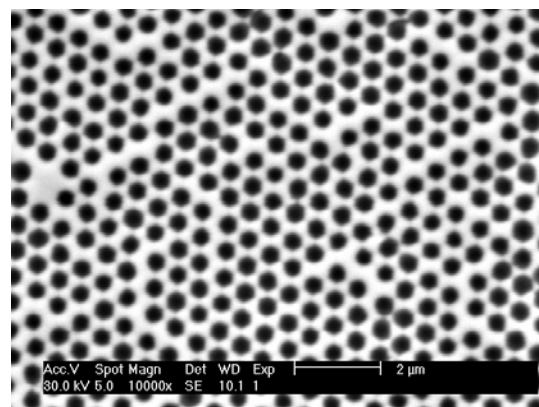

**Figure S3.** A typical SEM image of the ordered-spherical-cavity gold substrates (600 nm sphere templated, grown to 450 nm by electrodeposition) employed in this study taken with a Philips XL30 environmental scanning electron microscope.

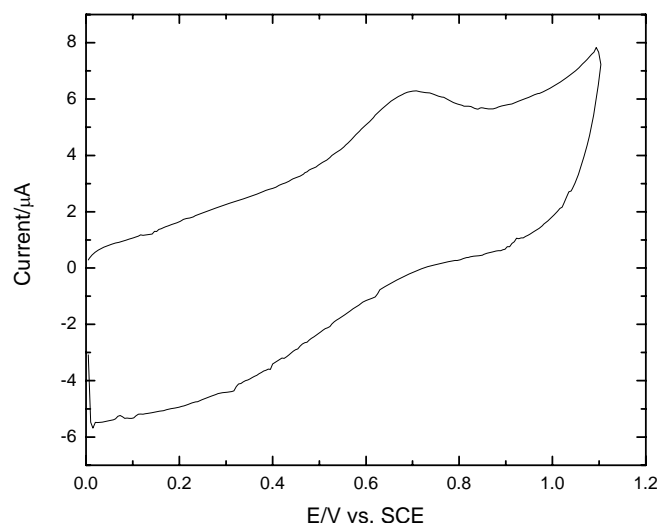

**Figure S2.** Cyclic voltammogram of Cy3<sup>TM</sup> immobilized on gold surface recorded in acetonitrile (0.3 M TBAP), degassed for 15 min. with Argon and blanketed during experiment at a scan rate of 100 mV s<sup>-1</sup> on a 1mm diameter disc electrode. The surface coverage determined for Cy3<sup>TM</sup> is larger, as expected, than Cy5<sup>TM</sup> at 8.64 x 10<sup>-11</sup> mol cm<sup>-2</sup>.
